# Supplementary material for: Investigating gold nanorod-mediated hydrolysis of acetylthiocholine: a way for electrochemical detection of organophosphate pesticides
Source: Royal Society of Chemistry journal article supplement (doi:10.1039/d4en00913d), 2024-12-11
Supplement: d4en00913d1.pdf [file d4en00913d1.pdf]

**Investigating gold nanorod-mediated hydrolysis of acetylthiocholine: A way for  
electrochemical detection of organophosphate pesticides**

**Chumki Praharaj<sup>1</sup>, Smriti Singh<sup>1,2</sup>, Pranav Tripathi<sup>3</sup>, Seema Nara<sup>1\*</sup>**

<sup>\*1</sup>Department of Biotechnology, Motilal Nehru National Institute of Technology Allahabad,  
Prayagraj, U.P., India

<sup>2</sup>Department of Biotechnology and Chemical Engineering, School of Civil, Biotechnology,  
and Chemical Engineering, Manipal University Jaipur, Jaipur, Rajasthan, India

<sup>3</sup>Department of Agriculture, School of Agriculture & Development, Central University of  
South Bihar, Bihar, India

\*Corresponding Address: Dr. Seema Nara, Department of Biotechnology, Motilal Nehru  
National Institute of Technology Allahabad, Prayagraj-211004, U.P. India.

Ph.No. 91-0532-2271238.

E-mail Id: [seemanara@mnnit.ac.in](mailto:seemanara@mnnit.ac.in), [seemanara@gmail.com](mailto:seemanara@gmail.com)

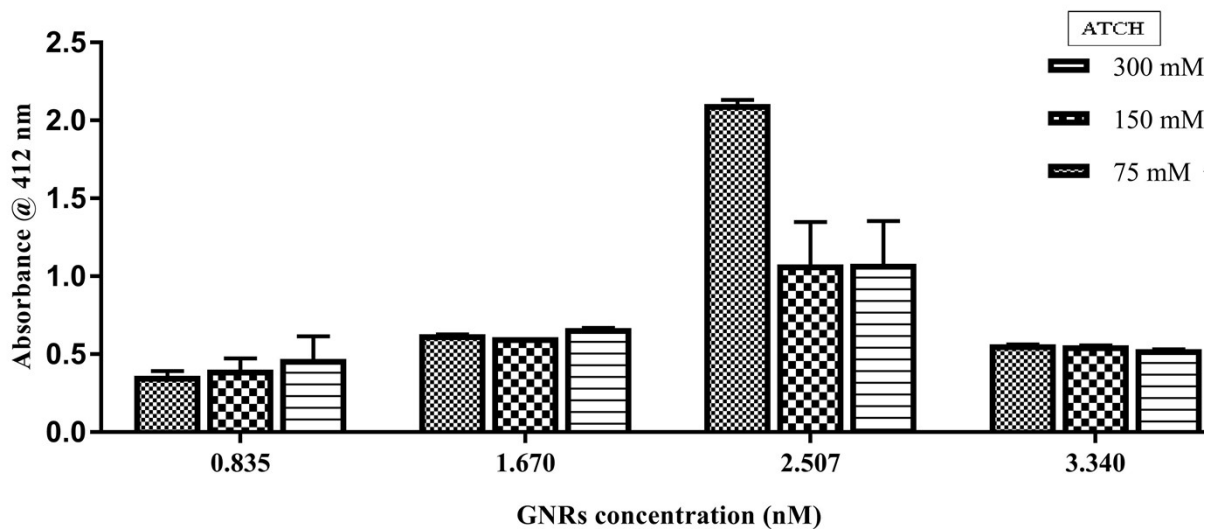

\*N=3; N= No. of times the assay is carried out.

**Figure S1.** Optimization of GNRs and ATCH substrate concentration in GNR-based modified Ellman's assay.

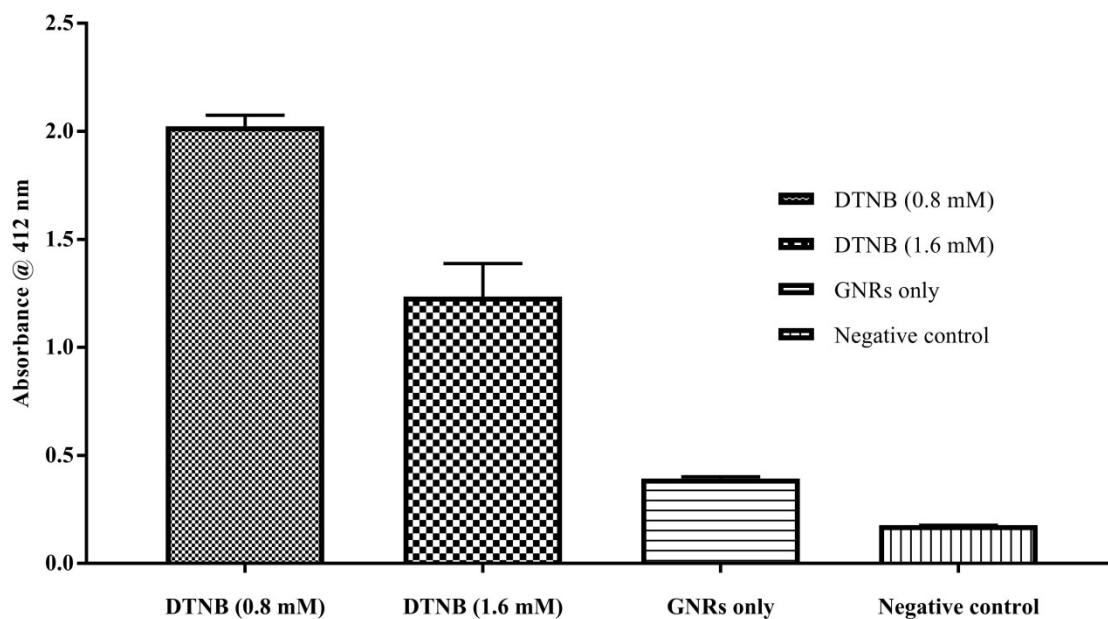

\*N=3; N= No. of times the assay is carried out.

**Figure S2.** Optimization of DTNB concentration in GNR-based modified Ellman's assay.

**Table S1.** FeCl<sub>3</sub> mediated detection of acetic acid in various reaction permutations.

| Enzyme used  | Substrate | Formation<br>of brown<br>precipitate | Image                                                                               | Inference                                           |
|--------------|-----------|--------------------------------------|-------------------------------------------------------------------------------------|-----------------------------------------------------|
| AChE         | ACTH      | ✓                                    |    | Breakdown of substrate to form<br>acetic acid       |
| GNRs         | ACTH      | ✓                                    |    |                                                     |
| AChE         | ACH       | ✓                                    |    |                                                     |
| GNRs         | ACH       | ✓                                    |    |                                                     |
| No<br>Enzyme | ACTH      | ✗                                    |   | No conversion of substrate, no<br>acetic acid forms |
| No<br>Enzyme | ACH       | ✗                                    |  | -do-                                                |

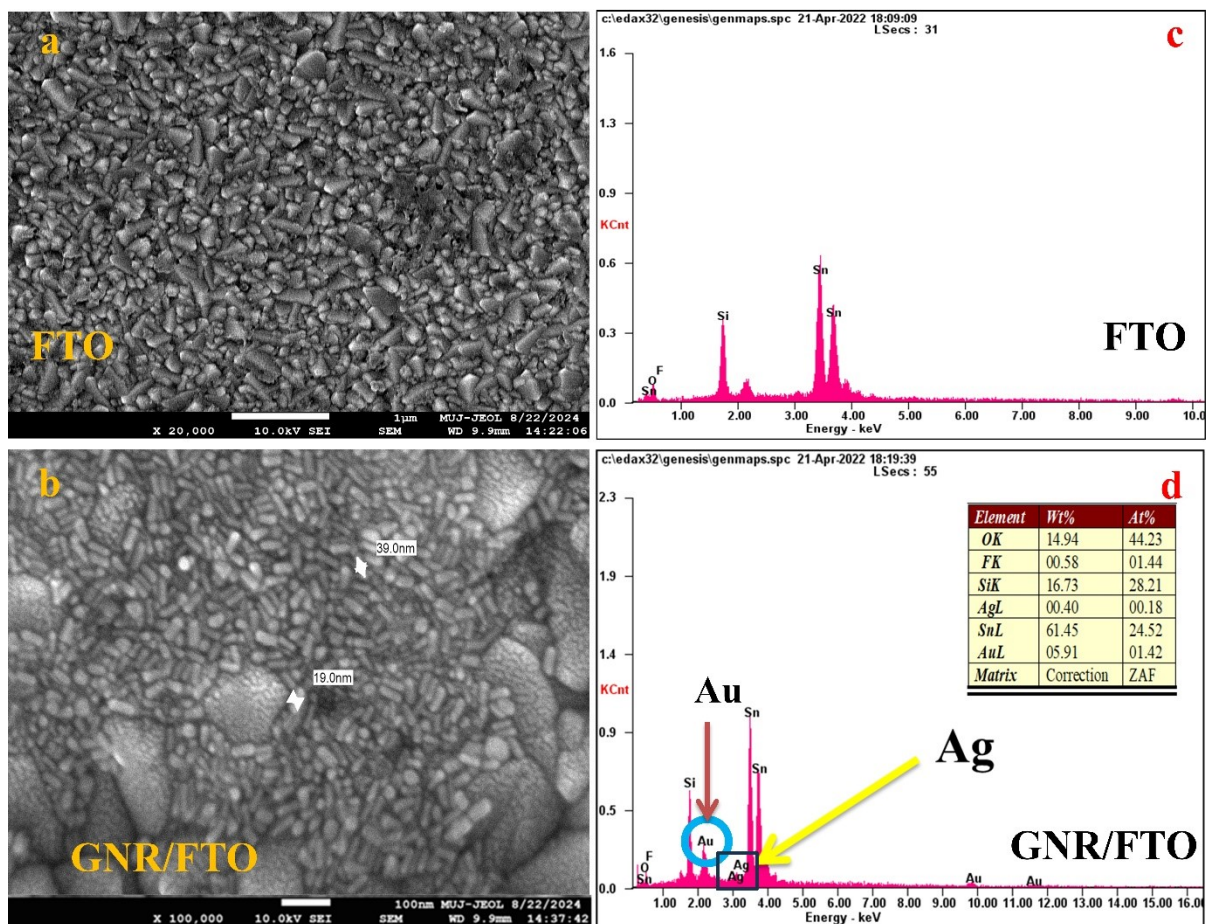

**Figure S3.** SEM images (a-b), SEM-EDX (c-d) graphs of Pristine FTO and GNR/FTO working electrode, and elemental distribution of GNR/FTO (in inset of figure S3d).

**Table S2.** Electrochemical parameters of Working electrodes (Only FTO (bare) and GNR/FTO) from cyclic voltammogram at different scan rates in  $1 \times 10^{-3}$  M Ferriferrocyanide with 0.5 M KCl as electrolyte.

| Scan rate<br>(mV/s) | Oxidation<br>Potential<br>Epa (V) | Reduction<br>Potential<br>Epc (V) | Ipa (V) | Ipc (V) | Ipa/Ipc | $\Delta E_p =$<br>(Epa-Epc) | Working<br>Electrode |
|---------------------|-----------------------------------|-----------------------------------|---------|---------|---------|-----------------------------|----------------------|
| 10                  | 0.3413                            | 0.1764                            | 0.3877  | -0.3126 | 1.240   | 0.1649                      | Pristine             |
|                     | 0.3508                            | 0.147                             | 0.6064  | -0.6002 | 1.01    | 0.2038                      | GNR                  |
| 30                  | 0.3738                            | 0.1418                            | 0.6375  | -0.5027 | 1.268   | 0.232                       | Pristine             |
|                     | 0.3508                            | 0.147                             | 0.8490  | -0.8404 | 1.01    | 0.2038                      | GNR                  |
| 50                  | 0.3874                            | 0.129                             | 0.7923  | -0.6244 | 1.2688  | 0.2584                      | Pristine             |
|                     | 0.3508                            | 0.147                             | 1.2128  | -1.2005 | 1.01    | 0.2038                      | GNR                  |
| 70                  | 0.4008                            | 0.1111                            | 0.9119  | -0.7177 | 1.2705  | 0.2897                      | Pristine             |
|                     | 0.3508                            | 0.147                             | 1.3341  | -1.3206 | 1.01    | 0.2038                      | GNR                  |
| 100                 | 0.4104                            | 0.1013                            | 1.0641  | -0.8311 | 1.28    | 0.3091                      | Pristine             |
|                     | 0.3508                            | 0.147                             | 1.5161  | -1.5007 | 1.01    | 0.2038                      | GNR                  |
| 130                 | 0.4221                            | 0.0938                            | 1.1887  | -0.9257 | 1.284   | 0.3283                      | Pristine             |
|                     | 0.3508                            | 0.147                             | 1.6374  | -1.6207 | 1.008   | 0.2038                      | GNR                  |
| 150                 | 0.4225                            | 0.0853                            | 1.2612  | -0.9834 | 1.284   | 0.3372                      | Pristine             |
|                     | 0.3508                            | 0.147                             | 1.6980  | -1.6807 | 1.01    | 0.2038                      | GNR                  |

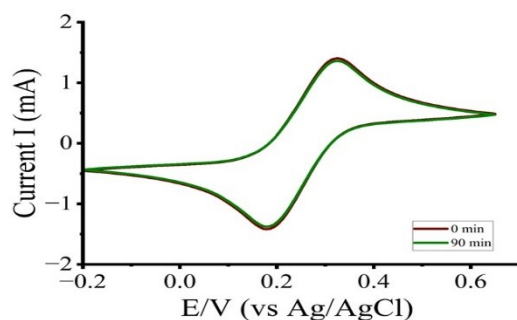

**Figure S4.** CV of GNR/FTO working electrode at 0 min (dark red line) and 90 min (green line) with  $1.0 \times 10^{-3}$  M Ferri-ferrocyanide and 0.5 M KCl electrolyte. (N=3. Where N\* number of CV cycles).

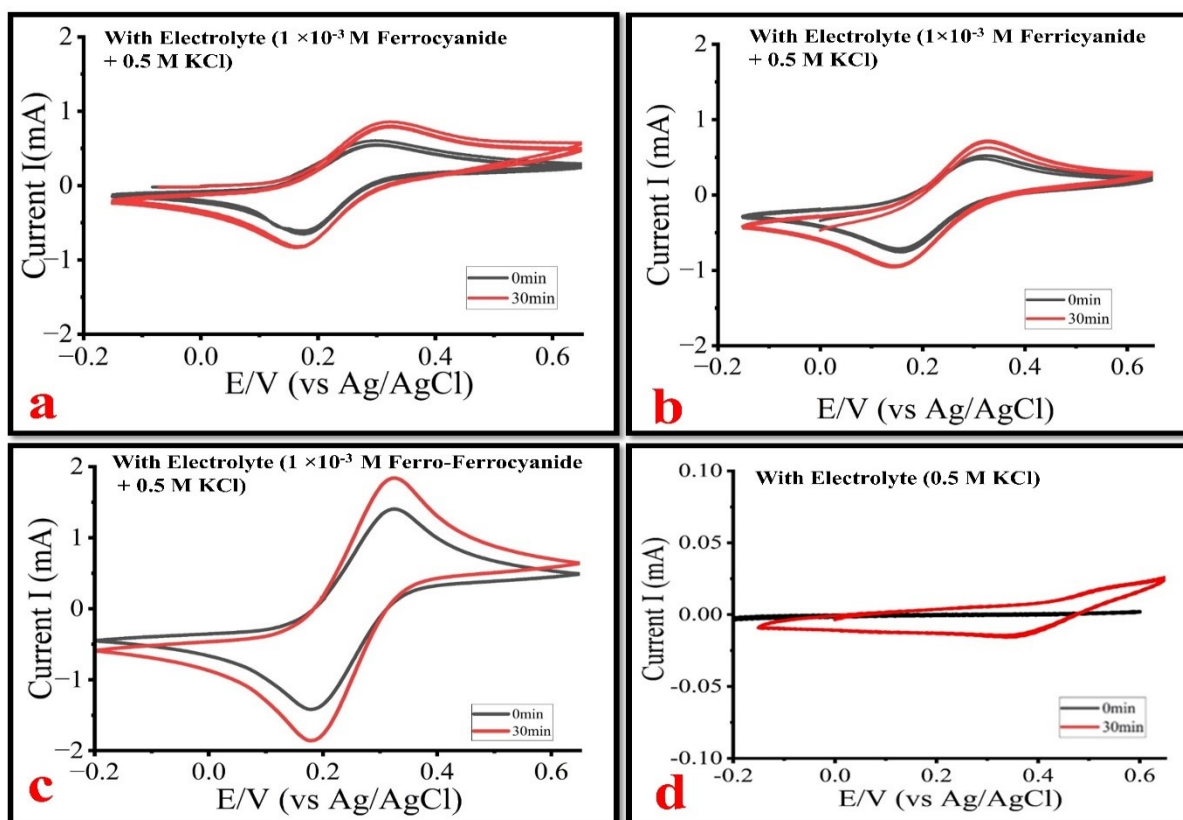

**Figure S5.** CVs of GNR/FTO with ATCH (substrate) in electrolyte having a) ferrocyanide + KCl, b) ferricyanide + KCl, c) both Ferri-Ferrocyanide + KCl, and d) KCl, at 0 min and after 30 min reaction time. (N=3. Where N\* number of CV cycles).

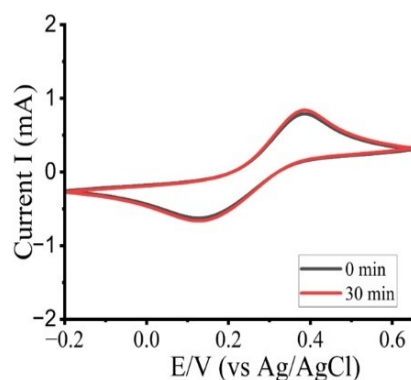

**Figure S6.** CVs of FTO with ATCH (substrate) in electrolyte having Ferri-Ferrocyanide at 0 min and after 30 min reaction time. (N=3. Where N\* number of CV cycles).

**Table S3.** Interaction energy with two Au at LANL2DZ using effective core potential basis sets (ECP) for gold atom and B3LYP/6-31+G\* for the rest of the atoms. The calculated interaction energy values are given in eV.

| Molecule | $E_{\text{Molecule}}$ (eV) | $E_{\text{Complex}}$ (eV) | $E_{\text{Au}}$ (eV) | $\Delta E$ (eV) |
|----------|----------------------------|---------------------------|----------------------|-----------------|
| ACTH     | -21886.43                  | -28118.34                 | -7312.355            | -13544.271      |
| ACH      | -13098.52                  | -20461.42                 | -7312.355            | -14675.254      |

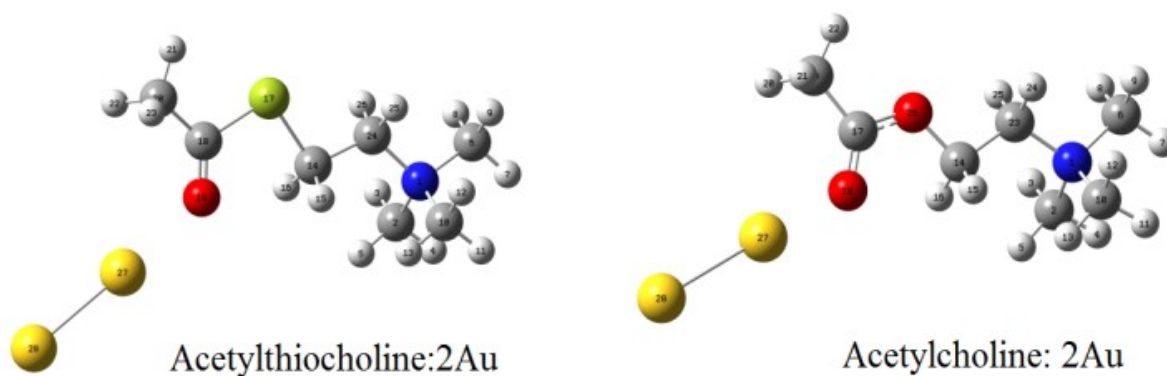

**Figure S7.** Interaction geometry with Acetylthiocholine:2Au and Acetylcholine:2Au with gold at LANL2DZ using effective core potential basis sets (ECP) for gold atom and B3LYP/6-31+G\* for the rest of the atoms.

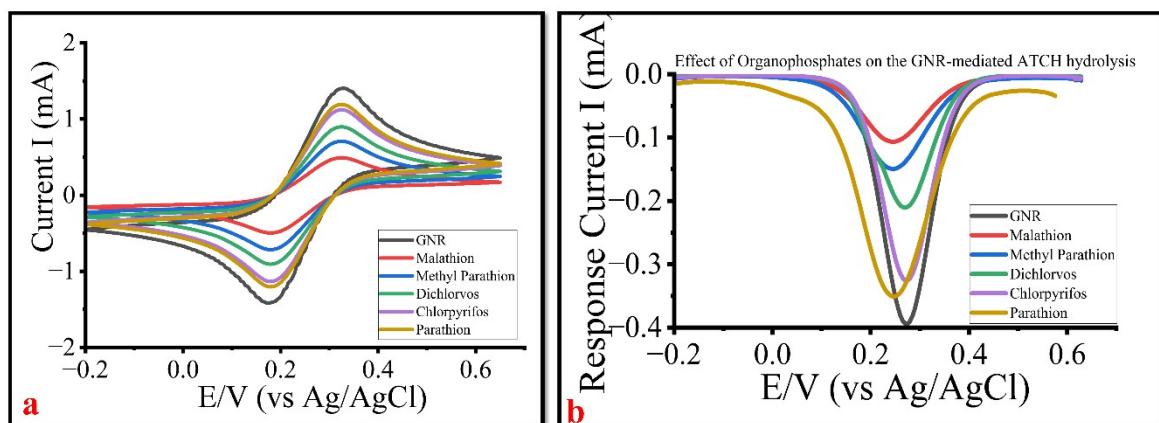

**Figure S8.** a) CV, and b) DPV of GNR mediated ATCH hydrolysis in the presence of various OPs (after 40 min of prior incubation of OPs with GNRs) ( $N=3$ . Where  $N^*$  number of CV cycles and DPV).

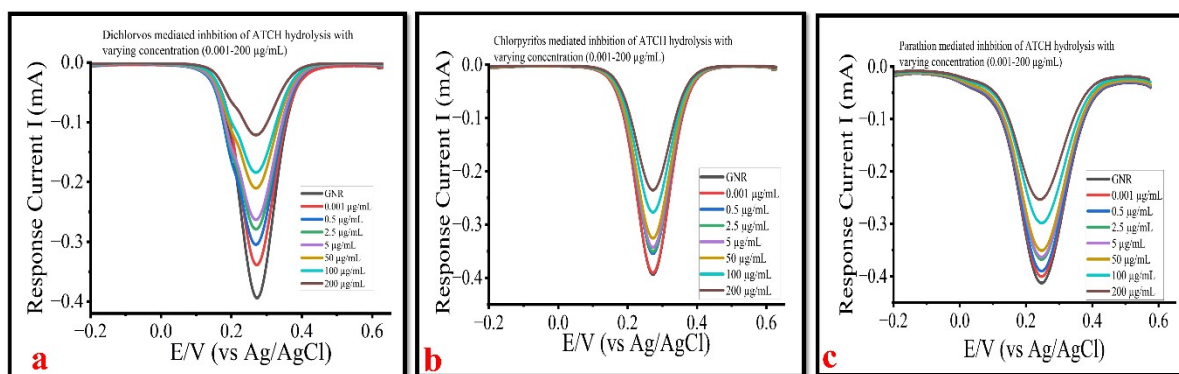

**Figure S9.** DPV response on varying concentrations of a) Dichlorvos, b) Chlorpyrifos, and c) Parathion. ( $N=3$ . Where  $N^*$  number of CV cycles).



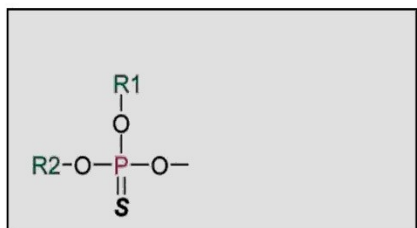

Organophosphate  
(General Structure)

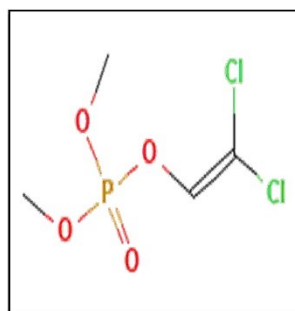

Dichlorvos

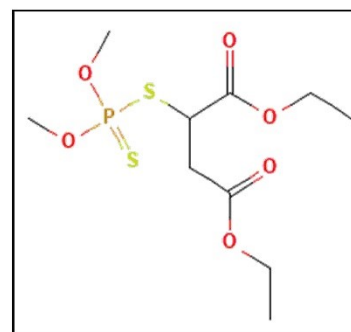

Malathion

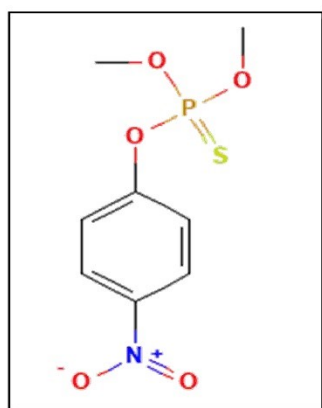

Methyl Parathion

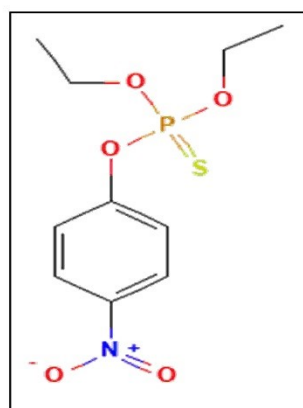

Parathion

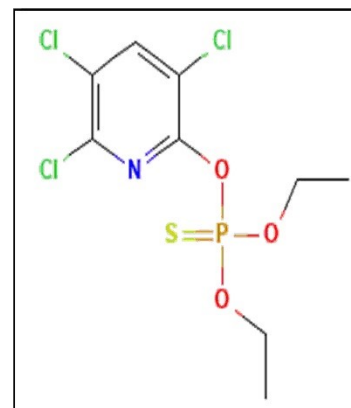

Chlorpyrifos

**Figure S10.** Basic chemical structures of Organophosphate (where R 1,2,3... are any alkyl group)<sup>1</sup>, and representative of different class of organophosphate i.e. Dichlorvos (Orthophosphate)<sup>2</sup>, Malathion (Dithiophosphate)<sup>3</sup>, Methyl Parathion<sup>4</sup>, Parathion<sup>5</sup>, and Chlorpyrifos (Phosphorothionate)<sup>6</sup>. (Ref. <http://npic.orst.edu/mcapro/opbiomarkers.html> accessed on 14/02/2024)

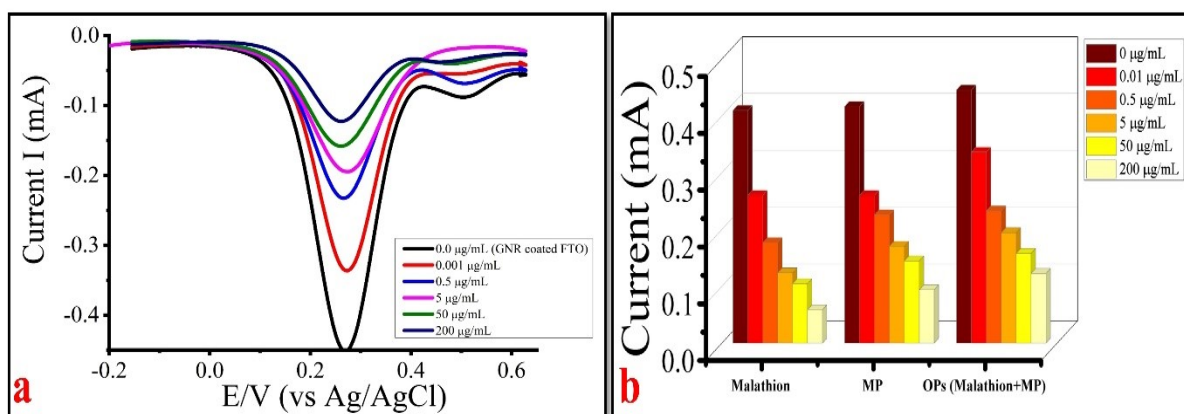

**Figure S11.** a) DPV of organophosphates (Malathion+Methyl Parathion) coated GNR/FTO, b) Comparison of OPs individual and mixed effect on GNR-mediated ATCH hydrolysis (OPs-organophosphates, MP-methyl parathion) (N=3. Where N\* number of DPV cycles).

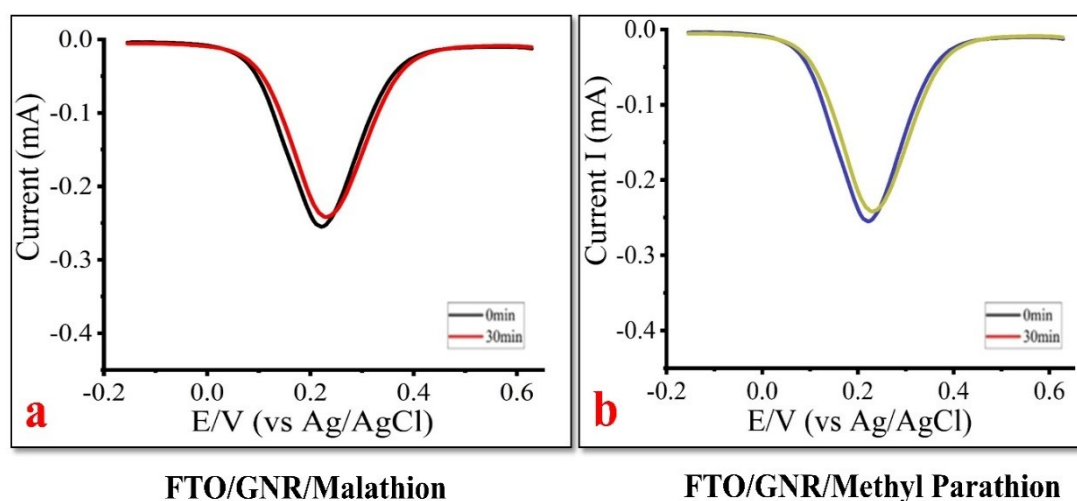

**Figure S12.** DPV of organophosphate coated FTO in the absence of ATCH a) GNR-Malathion/FTO, and b) GNR-Methyl Parathion/FTO (N=3. Where N\* number of DPV cycles); Concentration of OPs used is 50.0  $\mu\text{g mL}^{-1}$ .

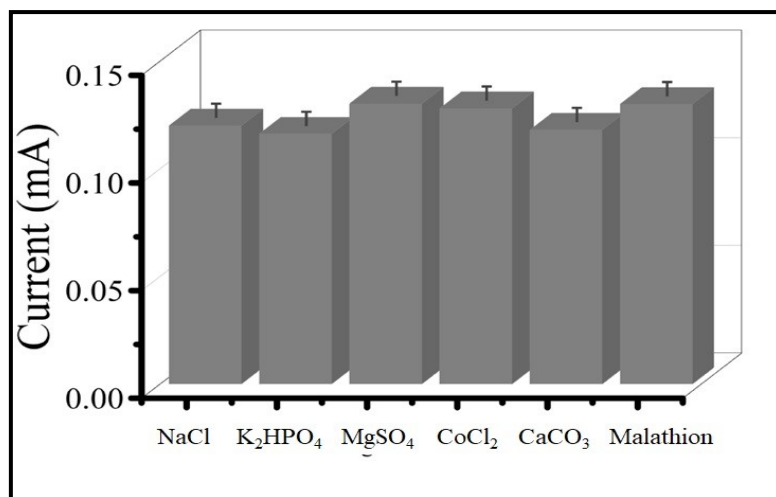

**Figure S13.** Selectivity of fabricated FTOs with common salts present in water resources.

Error bars indicate the standard deviation for the three consecutive scans for DPV with  $R=0.9$  for fabricated FTOs. ( $N=2$ . Where  $N$  is number of times assay was performed); with  $50.0 \mu\text{M}$  concentration of interfering salts (interference).

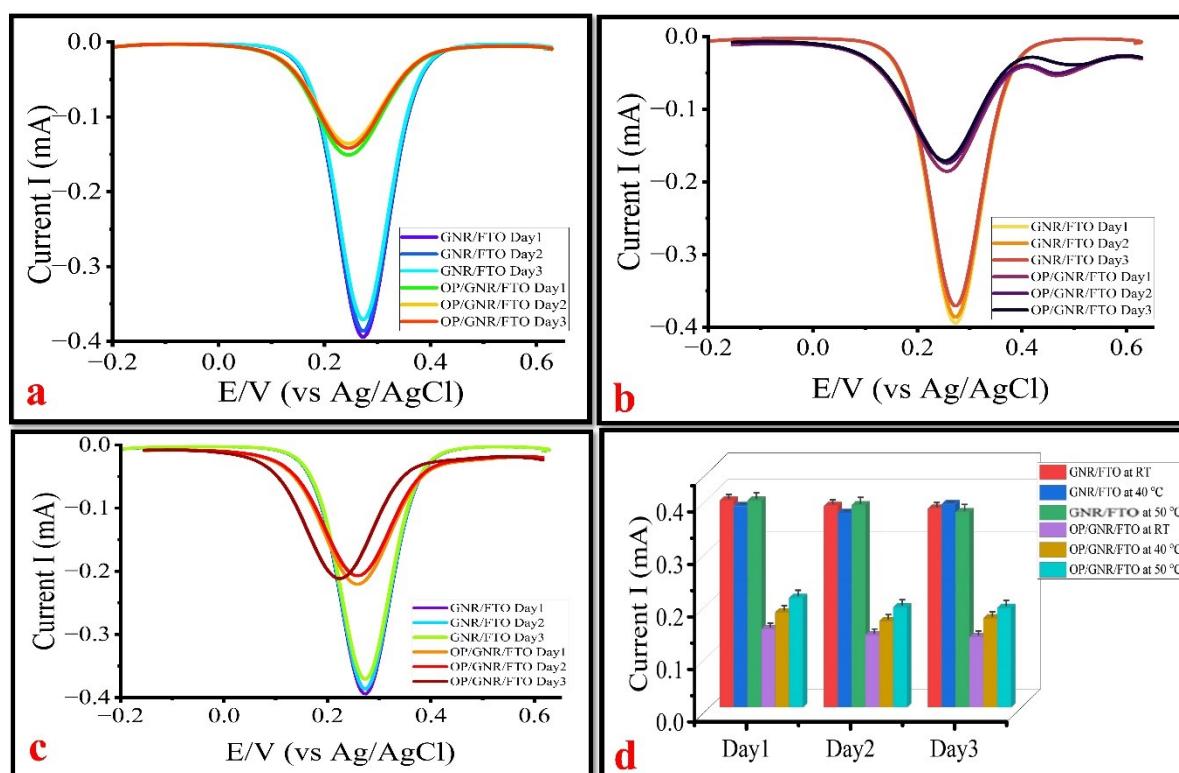

**Figure S14.** Stability of the GNR/FTO and GNR-OP/FTO. a, b, and c are DPV of fabricated FTOs at RT, 40 °C and 50 °C respectively, up to three days, and d is a bar graph of response

current vs time (Days). Error bars indicate the standard deviation for the three consecutive scans for DPV with R=0.9 for both WEs.

**Table S4.** Recovery data of spiked river (Ganga) water samples with OP (malathion)

| <b>Spiked Pool</b>          | <b>Spiked concentration<br/>(<math>\mu\text{g mL}^{-1}</math>)</b> | <b>Expected<br/>Concentration<br/>(E) (<math>\mu\text{g mL}^{-1}</math>)</b> | <b>Observed<br/>Concentration<br/>(O) (<math>\mu\text{g mL}^{-1}</math>)</b> | <b>% Recovery<br/>= (O/E) *100</b> |
|-----------------------------|--------------------------------------------------------------------|------------------------------------------------------------------------------|------------------------------------------------------------------------------|------------------------------------|
| River Water<br>(Non-spiked) | -                                                                  | -                                                                            | 0.001                                                                        | -                                  |
| Low Spiked<br>sample        | 0.001                                                              | 0.002                                                                        | 0.002                                                                        | 100.0                              |
| Medium<br>Spiked<br>sample  | 2.5                                                                | 2.5001                                                                       | 2.6                                                                          | 104                                |
| High Spiked<br>sample       | 50.0                                                               | 50.001                                                                       | 50.120                                                                       | 101.238                            |

**Reference:**

1. <http://npic.orst.edu/mcapro/opbiomarkers.html> accessed on 14/02/2024.
2. <https://pubchem.ncbi.nlm.nih.gov/compound/Dichlorvos> accessed on 14/02/2024.
3. <https://pubchem.ncbi.nlm.nih.gov/compound/Malathion> accessed on 14/02/2024.
4. <https://pubchem.ncbi.nlm.nih.gov/compound/Methyl-parathion#section=2D-Structure> accessed on 14/02/2024.
5. <https://pubchem.ncbi.nlm.nih.gov/compound/Parathion#section=2D-Structure> accessed on 14/02/2024.
6. <https://pubchem.ncbi.nlm.nih.gov/compound/Chlorpyrifos> accessed on 14/02/2021.
